# Supplementary material for: Massive expansion of human gut bacteriophage diversity
Source: PubMed Central journal article supplement (PMC7895897; doi:10.1016/j.cell.2021.01.029), 2021-02-18
Supplement: mmc1.pdf [file mmc1.pdf]

**Cell, Volume 184**

**Supplemental Information**

**Massive expansion of human gut bacteriophage diversity**

**Luis F. Camarillo-Guerrero, Alexandre Almeida, Guillermo Rangel-Pineros, Robert D. Finn, and Trevor D. Lawley**

| <b>crAss-like genus</b> | <b>Predicted hosts</b>                 |
|-------------------------|----------------------------------------|
| I                       | NA                                     |
| II                      | NA                                     |
| III                     | <i>Bacteroides_B vulgatus</i>          |
| IV                      | <i>Bacteroides xylanisolvens_B</i>     |
|                         | <i>Bacteroides caccae</i>              |
| V                       | <i>Fusicatenibacter saccharivorans</i> |
|                         | <i>Lachnospira eligens</i>             |
| VI                      | <i>Bacteroides xylanisolvens_B</i>     |
|                         | <i>Prevotella copri</i>                |
| VII                     | <i>Bacteroides thetaiotaomicron</i>    |
|                         | <i>Bacteroides_B massiliensis</i>      |
|                         | <i>Bacteroides_B dorei</i>             |
|                         | <i>Bacteroides caccae</i>              |
|                         | <i>Bacteroides faecis</i>              |
|                         | <i>Bacteroides eggerthii</i>           |
|                         | <i>Bacteroides xylanisolvens_B</i>     |
|                         | <i>Bacteroides_B vulgatus</i>          |
|                         | <i>Bacteroides uniformis</i>           |
| VIII                    | <i>Prevotella copri</i>                |
| IX                      | <i>Prevotella copri</i>                |
| X                       | <i>Parabacteroides merdae</i>          |
|                         | <i>Parabacteroides distasonis</i>      |

**Table S1.** Predicted hosts of the crAss-like family

| Global_VC | GPD_phage_ID | Identifier | Source | Sample                                       | Culture Collection | Culture Collection Number |
|-----------|--------------|------------|--------|----------------------------------------------|--------------------|---------------------------|
| VC_2      | ivig_4281    | ERR2230082 | HBC    | Bacteroides dorei ERR2230082                 | WSI                | ERR2230082                |
| VC_2      | ivig_3443    | ERR1022271 | HBC    | Bacteroides uniformis ERR1022271             | WSI                | ERR1022271                |
| VC_2      | ivig_4319    | ERR2230141 | HBC    | Bacteroides uniformis ERR2230141             | WSI                | ERR2230141                |
| VC_2      | ivig_4298    | ERR2230119 | HBC    | Bacteroides uniformis ERR2230119             | WSI                | ERR2230119                |
| VC_2      | ivig_3716    | ERR1022414 | HBC    | Bacteroides cellulosilyticus ERR1022414      | DSMZ               | DSM 108229                |
| VC_2      | ivig_3679    | ERR2221211 | HBC    | Bacteroides acidifaciens ERR2221211          | WSI                | ERR2221211                |
| VC_2      | ivig_3715    | ERR1022413 | HBC    | Bacteroides thetaiotaomicron ERR1022413      | WSI                | ERR1022413                |
| VC_2      | ivig_4318    | ERR2230138 | HBC    | Bacteroides uniformis ERR2230138             | WSI                | ERR2230138                |
| VC_71     | ivig_3350    | ERR2221142 | HBC    | Bifidobacterium pseudocatenulatum ERR2221142 | WSI                | ERR2221142                |
| VC_65     | ivig_3375    | ERR2221151 | HBC    | Lachnospiraceae nov. ERR2221151              | WSI                | ERR2221151                |
| VC_94     | ivig_3609    | ERR1022353 | HBC    | Lachnospiraceae nov. ERR1022353              | WSI                | ERR1022353                |
| VC_65     | ivig_3761    | ERR1022439 | HBC    | Eisenbergiella tayi ERR1022439               | WSI                | ERR1022439                |
| VC_16     | ivig_3950    | ERR1203972 | HBC    | Lachnospiraceae nov. ERR1203972              | WSI                | ERR1203972                |
| VC_50     | ivig_4334    | ERR2230158 | HBC    | Bifidobacterium longum ERR2230158            | WSI                | ERR2230158                |
| VC_50     | ivig_4156    | ERR2221351 | HBC    | Bifidobacterium longum ERR2221351            | NCIMB              | NCIMB 15144               |
| VC_55     | ivig_3549    | ERR1022318 | HBC    | Eubacterium rectale ERR1022318               | WSI                | ERR1022318                |
| VC_75     | ivig_3398    | ERR2221161 | HBC    | Lachnospiraceae nov. ERR2221161              | WSI                | ERR2221161                |
| VC_78     | ivig_4245    | ERR2221398 | HBC    | Escherichia coli ERR2221398                  | WSI                | ERR2221398                |
| VC_138    | ivig_4044    | ERR2221275 | HBC    | Dorea formicigenerans ERR2221275             | WSI                | ERR2221275                |
| VC_156    | ivig_3731    | ERR1022423 | HBC    | Anaerostipes hadrus ERR1022423               | WSI                | ERR1022423                |
| VC_156    | ivig_3760    | ERR1022437 | HBC    | Fusicatenibacter saccharivorans ERR1022437   | CCUG & JCM         | CCUG 68552 & JCM 31268    |
| VC_168    | ivig_3524    | ERR1022310 | HBC    | Ruminococcus gnavus ERR1022310               | DSMZ               | DSM 108212                |
| VC_168    | ivig_4348    | ERR171257  | HBC    | Ruminococcus gnavus ERR171257                | WSI                | ERR171257                 |
| VC_175    | ivig_3612    | ERR1022356 | HBC    | Bifidobacterium pseudocatenulatum ERR1022356 | WSI                | ERR1022356                |
| VC_183    | ivig_3767    | ERR1022442 | HBC    | Ruminococcaceae nov. ERR1022442              | WSI                | ERR1022442                |

|         |           |            |     |                                         |      |            |
|---------|-----------|------------|-----|-----------------------------------------|------|------------|
| VC_204  | ivig_3670 | ERR1022391 | HBC | Lachnospira nov. ERR1022391             | BCCM | LMG 29490  |
| VC_288  | ivig_3565 | ERR1022327 | HBC | Faecalibacterium prausnitzii ERR1022327 | WSI  | ERR1022327 |
| VC_752  | ivig_3547 | ERR1022317 | HBC | Ruminococcaceae nov. ERR1022317         | WSI  | ERR1022317 |
| VC_757  | ivig_4035 | ERR2230078 | HBC | Collinsella aerofaciens ERR2230078      | CCUG | CCUG 73007 |
| VC_1461 | ivig_4025 | ERR2230076 | HBC | Lachnoclostridium nov. ERR2230076       | WSI  | ERR2230076 |

**Table S2.** Global VCs found in publicly available gut isolates.
